# Supplementary material for: Negative regulation of NEMO signaling by the ubiquitin E3 ligase MARCH2
Source: PubMed Central journal article supplement (PMC7604578; doi:10.15252/embj.2020105139), 2020-09-16

**Fig 6B**

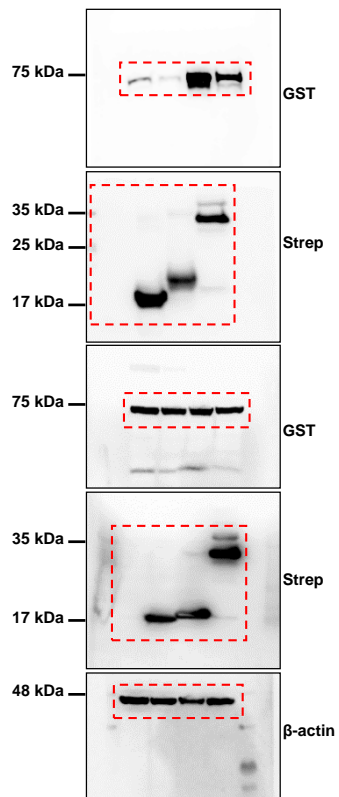

**Fig 6D**

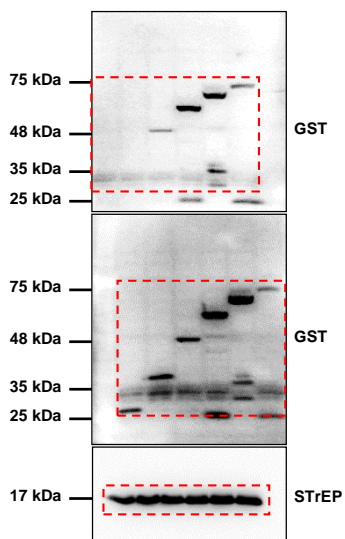

**Fig 7F**

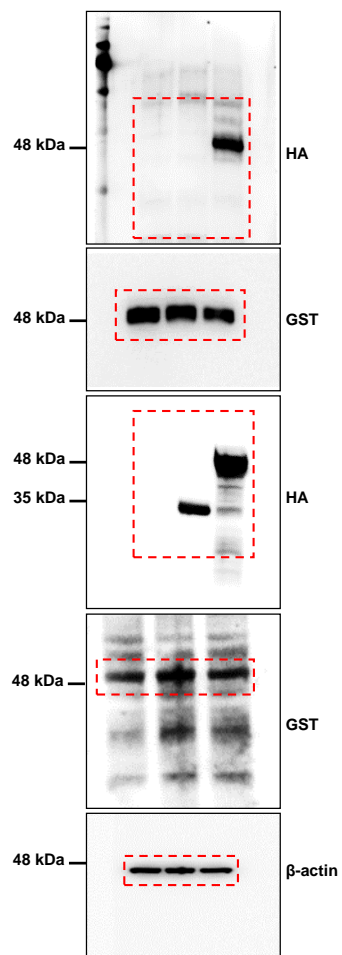

**Fig 7G**

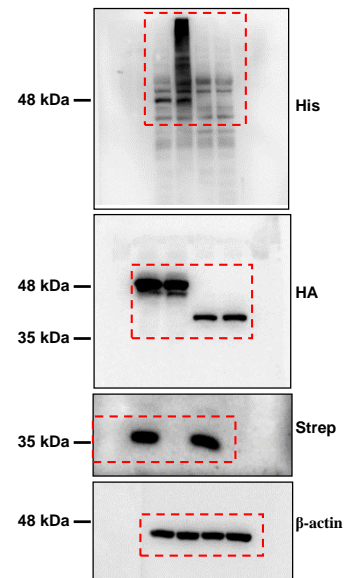

**Fig 7J**

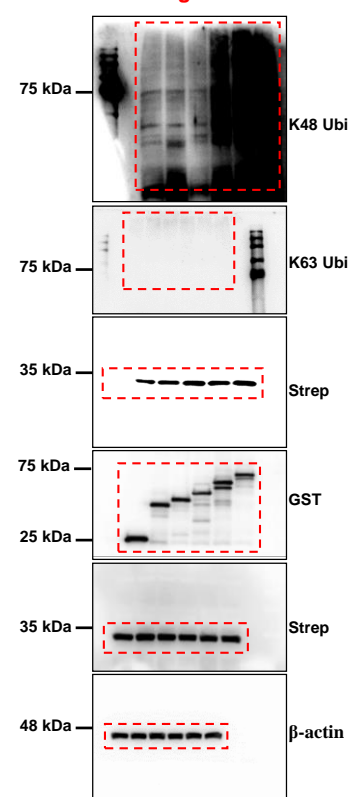

**Fig 7I**

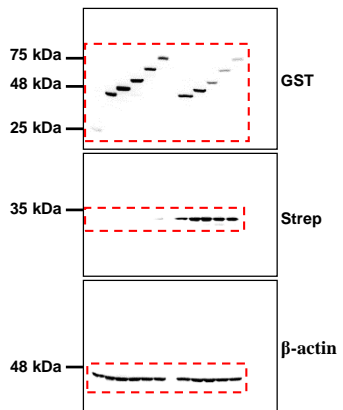

Supplement: EMBJ-39-e105139-s008.pdf [file EMBJ-39-e105139-s008.pdf]
